# Supplementary material
Source: ML conference proceedings conference paper supplement (https://openaccess.thecvf.com/content/CVPR2024/html/Ji_Enhancing_3D_Object_CVPR_2024_paper.html)
Supplement: Supplementary file [file Ji_Enhancing_3D_Object_CVPR_2024_supplemental.pdf]

# Enhancing 3D Object Detection with 2D Detection-Guided Query Anchors (Supplementary Material)

Haoxuanye Ji<sup>2,\*,#</sup> Pengpeng Liang<sup>1,\*,\dagger</sup> Er kang Cheng<sup>2,\ddagger</sup>

<sup>1</sup>School of Computer and Artificial Intelligence, Zhengzhou University <sup>2</sup>Nullmax  
jihaoxuanye@163.com, {liangpcs, twokang.cheng}@gmail.com

## Appendix

### A. More Implementation Details

We present the width range ( $w_g^{\min}, w_g^{\max}$ ), height range ( $h_g^{\min}, h_g^{\max}$ ), and length range ( $l_g^{\min}, l_g^{\max}$ ) of each category  $g$  in Table 1. The interval used to sample width, height, and length candidates is 0.05m.

| Category             | $(w_g^{\min}, w_g^{\max})$ | $(h_g^{\min}, h_g^{\max})$ | $(l_g^{\min}, l_g^{\max})$ |
|----------------------|----------------------------|----------------------------|----------------------------|
| Car                  | (1.4, 2.8)                 | (1.2, 3.1)                 | (3.4, 6.6)                 |
| Pedestrian           | (0.3, 1.0)                 | (1.0, 2.2)                 | (0.3, 1.3)                 |
| Bus                  | (2.6, 3.5)                 | (2.8, 4.6)                 | (6.9, 13.8)                |
| Truck                | (1.7, 3.5)                 | (1.7, 4.5)                 | (4.5, 14.0)                |
| Trailer              | (2.2, 2.3)                 | (3.3, 3.9)                 | (1.7, 14.0)                |
| Construction vehicle | (2.1, 3.4)                 | (2.0, 3.0)                 | (3.7, 7.6)                 |
| Motorcycle           | (0.4, 1.5)                 | (1.1, 2.0)                 | (1.2, 2.8)                 |
| Bicycle              | (0.4, 0.9)                 | (0.9, 2.0)                 | (1.3, 2.0)                 |
| Traffic cone         | (0.2, 1.2)                 | (0.5, 1.4)                 | (1.3, 2.0)                 |
| Barrier              | (1.7, 3.6)                 | (0.8, 1.4)                 | (0.3, 0.8)                 |

Table 1. The width, height, and length ranges of each class for anchor generation. The unit is meter.

### B. More Visualization Results

Fig. 1 shows the visual comparison between BEVFormer-small-DAB3D [1] and its QAF2D-enhanced version. Case 1 and Case 3 show that QAF2D can make the detections more accurate. Case 2 demonstrates that QAF2D can help detect small objects that are missed by BEVFormer-small-DAB3D.

Fig. 2 shows the visual comparison between SparseBEV [2] and its QAF2D-enhanced version. Case 1 and Case 2 show that QAF2D is useful in improving the accuracy of detection results, and Case 3 demonstrates that QAF2D can alleviate the problem of missed detection of small objects.

\*Equal contribution. #Work done during an internship at Nullmax.

\dagger Project lead. \ddagger Corresponding author.

## References

- [1] Zhiqi Li, Wenhai Wang, Hongyang Li, Enze Xie, Chonghao Sima, Tong Lu, Yu Qiao, and Jifeng Dai. Bevformer: Learning bird’s-eye-view representation from multi-camera images via spatiotemporal transformers. In *ECCV*, pages 1–18, 2022. 1
- [2] Haisong Liu, Yao Teng, Tao Lu, Haiguang Wang, and Limin Wang. Sparsebev: High-performance sparse 3d object detection from multi-camera videos. In *ICCV*, pages 18580–18590, 2023. 1

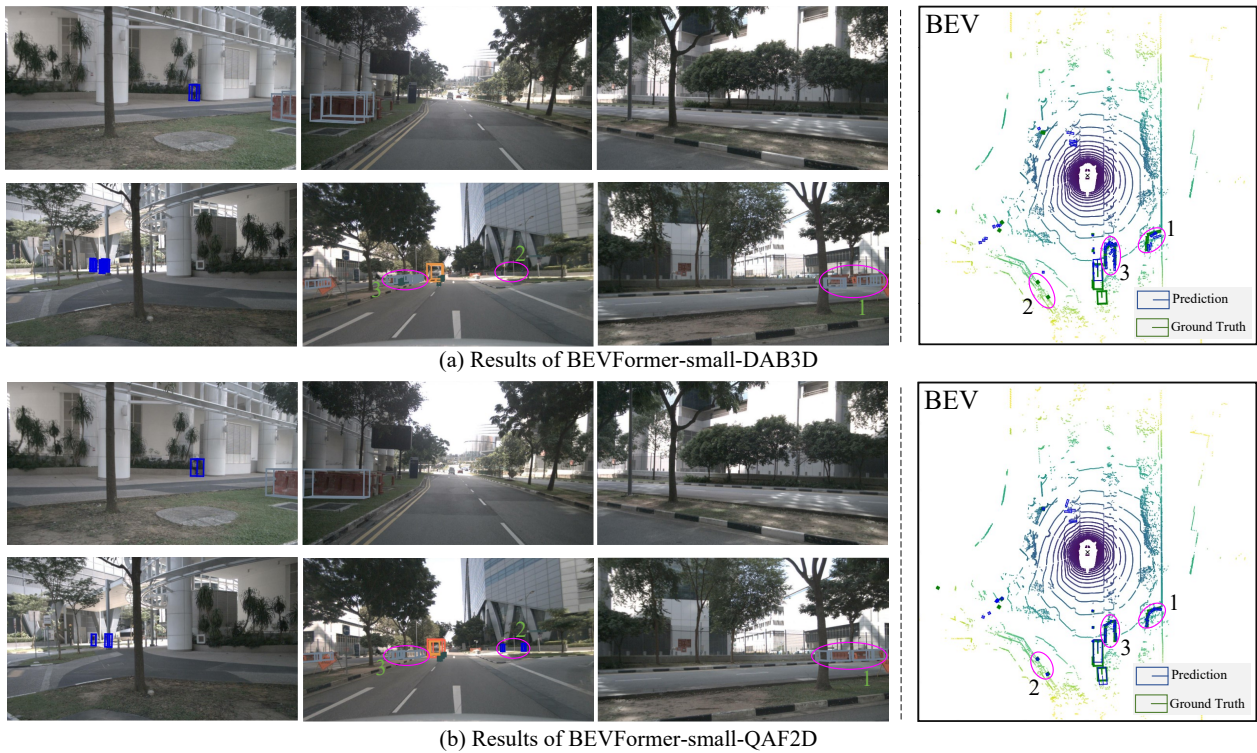

Figure 1. Visualization results of BEVFormer-small-DAB3D and BEVFormer-small-QAF2D. The results in multi-camera images are shown on the left, and the corresponding results in bird's-eye-view are shown on the right.

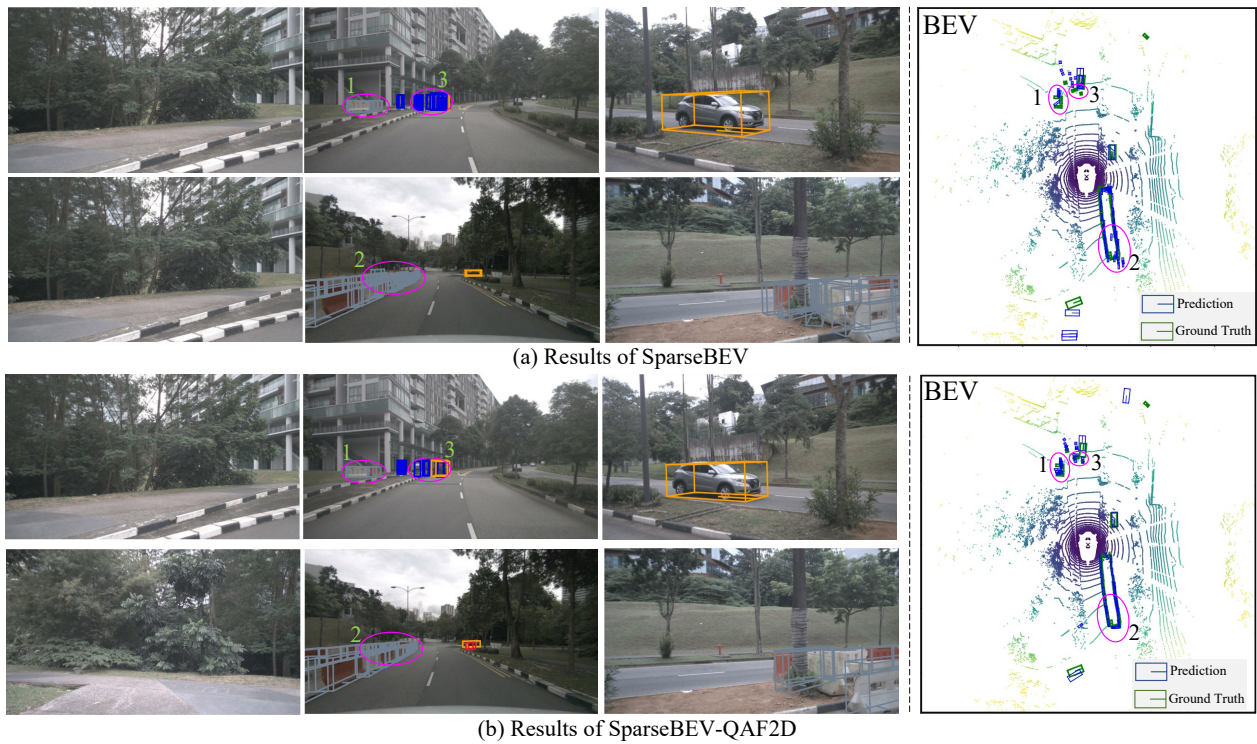

Figure 2. Visualization results of SparseBEV and SparseBEV-QAF2D. The results in multi-camera images are shown on the left, and the corresponding results in bird's-eye-view are shown on the right.
